# Supplementary material for: The effects of warm air intrusions in the high arctic on cirrus clouds
Source: Copernicus journal article supplement (doi:10.5194/egusphere-2023-2708), 2023-12-06
Supplement: Supplementary file [file egusphere-2023-2708-AC1-supplement.pdf]

## Referee #1

Dear Referee 1,

speaking for all co-authors I would like to thank you for putting your time and effort into this review. Thank you also for your very positive comments. In the following I will try to address all your comments and questions in detail. Your comments/questions are presented in Bolt lettering followed each by the reply. For changes in the text I present the **original text in blue** and the **changed or added text in green** color.

### General comments

- 1. Given that the paper is about differences between undisturbed arctic conditions (AC) and prevailing warm air intrusion conditions (WAI), I was expecting more details about flights grouping. “We studied the synoptic situation for each flight”, as written in Sect. 2.3.1, should be developed. What are the criteria for the classification? Please explain the information provided in Fig. 2.**

More details have been added to Sect 2.3.1 and it has been changed as follows:

In this study we aim to detect differences in cirrus clouds measured in the high arctic during undisturbed arctic conditions (AC) and during prevailing warm air intrusion conditions (WAI). In order to accurately identify the ambient conditions as AC and WAI and correctly group each flight into one of the two categories, various sources and parameters were used. The first step was already taken during the campaign. Daily weather briefings were held for the flight planning. Discussed during these briefings were amongst others the surface analysis, the development of circulation patterns, the wind fields and air mass advections as well as more specific forecasting indexes like the vertically integrated water vapor transport (IVT). The IVT is calculated from the surface and up to 300 hPa and is used to define WAIs and atmospheric rivers with a common threshold being  $250 \text{ kg}\cdot\text{m}^{-1}\cdot\text{s}^{-1}$ . This already allowed an early classification of the flights. Additionally, after the campaign we once again studied the synoptic situation for each flight, using the geopotential height, temperature and total column water vapor fields from the ERA5 reanalysis dataset (Hersbach et al., 2018), as well as the water vapor measurements from WALES. Flights during which the general circulation would allow for the transport of air masses from the mid-latitudes and elevated temperatures and water vapor concentrations were detected, were classified as WAI. Despite it not being set as a threshold during the selection, all AC flights had a mean water vapor mixing ratio strongly below 500 ppm as measured by WALES, while WAI flights had a mean strongly above 500 ppm. In Fig. 2 an example of the performed analysis is presented showcasing on the right side the geopotential heights allowing the northward transport and elevated water vapor concentrations. Henceforth, we shall refer to the cirrus clouds of the AC and WAI groups as arctic cirrus and WAI cirrus respectively. In order to be more precise in our classification parts of some flights were discarded, mostly due to HALO exiting the WAI events when performing turns.

- 2. In Table 3, what does “ $\pm$  value” mean? Is “value” a standard deviation or other?**

The  $\pm$  value is indeed the standard deviation. Clarification has been added to the description of the table:

Table 3: Differences in available water vapor, temperature and cloud geometric and optical characteristics during research flights of the HALO-(AC)3 campaign under arctic (AC) and warm air intrusion (WAI) conditions. Overview from ERA-5 reanalysis data and data from WALES measurements. Presented in value  $\pm$  standard deviation.

- Figure 3 is a very good illustration of the cloud masking. I note that this illustration is for flight RF17, which is in the AC category according to Fig. 2. I see cloud tops up to 9.5 km, which seems in contradiction with the fact that AC clouds have top height =  $6376 \pm 1195$  m in Table 3. Please clarify. Which part of the flight do we see in Fig. 3 in terms of latitude and longitude ranges?

For every time step during the flight, the in-cloud mask is used to define the cloud top and cloud base. Each flight is then assigned the average value and standard deviation. The value in Table 3 is the mean of all flights and the respective pooled standard deviation which could explain this well-noted discrepancy.

Fig. 3 contains all the available data from the flight as it is shown in Fig. 2. Fig. 3 has been renewed and now includes the information on latitude and longitude. A clarification has also been added to the caption of Fig. 3:

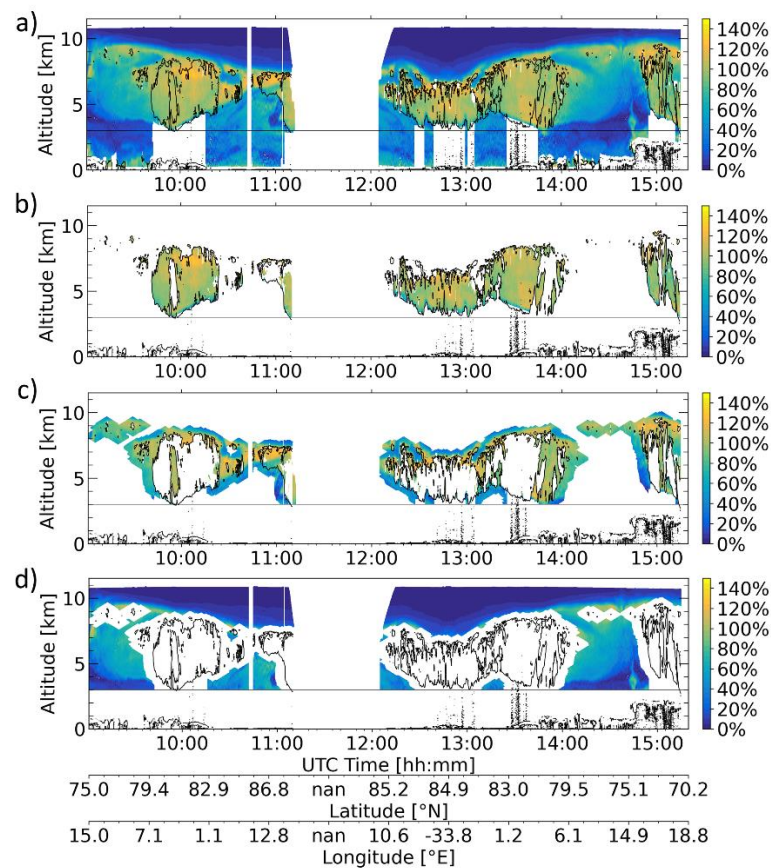

Figure 3: Example of cloud mask application. (a) Complete RHi curtain with cloud mask outline (b) In-cloud data (c) Near-cloud data and (d) cloud-free data. The black lines correspond to the mask parameters. The color scale represents RHi. White areas have no data. HALO-(AC)3 campaign research flight 17 on 11/04/2022, including the whole flight as shown in Fig. 2.

4. Regarding Table 3 and related text, it would be informative to show ECMWF temperature vs. altitude in AC and WAI conditions (perhaps add a figure?). I suggest comparing temperatures at base and top heights.

Plots were created for the two groups representing the probability densities of temperature with respect to altitude from ECMWF IFS data. The figure will be added as a supplement.

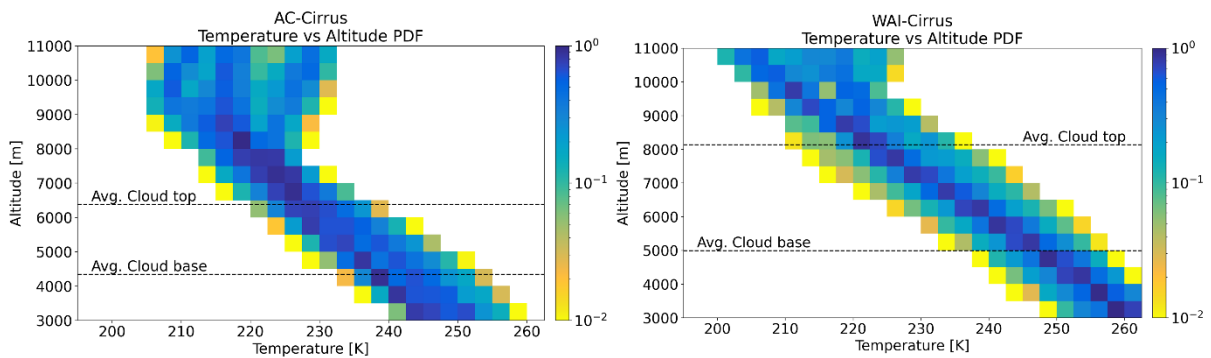

Supplement Figure 1: Probability density function of ambient temperature with respect to altitude for AC Cirrus group (Left) and WAI Cirrus group (Right). Also plotted are the respective average cloud base and cloud top heights for each group. Noticeable are the higher altitude of the thermal tropopause under WAI conditions and the generally warmer conditions especially at lower altitudes. Temperature data from ECMWF IFS.

#### 5. Nucleation process:

- Unlike in Dekoutsidis et al. (2023), which present a similar analysis but by comparing in situ and liquid origin cirrus clouds at mid-latitude, cloud temperature is not required to be smaller than 235 K (according for instance to Table 2 and as seen in Fig. 4), and it seems that the statistics provided in Table 4 and the discussions are by considering all temperatures. The wording “HOM regime” is misleading because it seems to actually mean “RH<sub>i</sub> > 147 %”, and the line for HOM threshold extending up to 265 K in Fig. 5 is confusing. Please clarify.

For the analysis of cirrus clouds over the midlatitudes the threshold at 235 K was seen as necessary for the cloud mask in order to filter out non-cirrus clouds at higher altitudes. For the HALO-(AC)3 measurements this was not necessary as an altitude threshold at 3km was found to be sufficient in filtering out mixed-phase and liquid clouds closer to the surface. An additional threshold at 235 K would in many cases remove warmer parts of cirrus clouds where HET nucleation is still possible.

The temperature dependent analysis of RH<sub>i</sub> based on Figure 4 and the nucleation thresholds presented therein are not immediately connected to the analysis in the four regimes.

Regarding Figure 4, the water saturation threshold has been added to each panel thus more strictly denoting the temperature and RH<sub>i</sub> ranges for the different nucleation processes. Namely, the 235 K for HOM nucleation. A small fraction of the data in the in-cloud and near-cloud areas is detected over the water saturation line as was the case also in Ovarlez et al., (2002) who performed in-situ measurements. Similar to them we also conclude that these are possibly artefacts or erroneous data, but represent a too small amount of the whole data set to have an effect on the further

analysis. Urbanek et al., (2017) also do not take the water saturation threshold into account in their analysis.

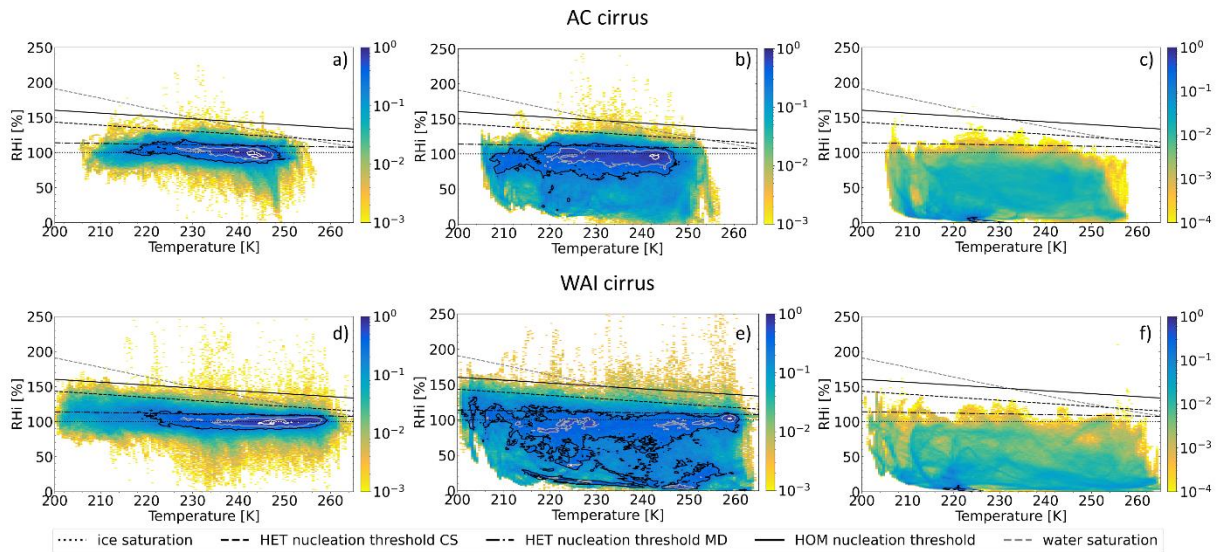

Figure 4: Probability densities of Relative Humidity over ice ( $RH_i$ ) with respect to temperature for: (a) Cirrus clouds measured under arctic conditions (Arctic cirrus), in-cloud (b) Arctic cirrus near-cloud (c) Arctic cirrus cloud-free (d) Cirrus clouds measured under WAI conditions (WAI cirrus), in-cloud (e) WAI cirrus near-cloud (f) WAI cirrus cloud-free. Panels (c) and (f) have a different range in the color scale than the other panels, but same to each other. The bin sizes are 0.5 K and 1 %  $RH_i$ . The contour lines represent the 0.25, 0.5 and 0.85 probability contours in black, grey and yellow respectively. The dotted line represents the ice saturation threshold ( $RH_i = 100\%$ ). The dash dotted line corresponds to the threshold for heterogeneous nucleation (HET) with mineral dust (MD) as the ice-nucleating particle (INP), which is efficient in initiating ice formation. The dashed line is the threshold for HET nucleation with coated soot (CS) as INP, which is not as easily activated as MD. The solid line denotes the threshold above which homogeneous nucleation (HOM) can take place. Ice crystals can form via HOM nucleation without the need of INPs. Finally, the grey dashed line represents the water saturation threshold above which nice ice crystals do not readily form.

Regarding our analysis in four  $RH_i$  regimes, we understand that the name selection - especially referring to the 'HOM regime' - might have been unfortunate. Our intention was to group  $RH_i$  values into bins where certain nucleation processes might be possible to take place under favorable conditions. The regimes have been renamed to: high  $RH_i$ , mid  $RH_i$ , low  $RH_i$  and subsaturated, keeping the same bin ranges.

Explanatory changes in the text are shown in the following:

### 2.3.5 Nucleation processes

The nucleation process of cirrus can be either homogeneous (HOM) or heterogeneous (HET). HOM nucleation occurs when supercooled solution droplets (SSPs) freeze at low temperatures ( $< 235$  K), but very high supersaturations are necessary (Koop et al., 2000; DeMott et al., 2003; Pruppacher and Klett, 2010). For HET nucleation to take place, ice-nucleating particles (INPs) are needed (DeMott et al., 2003; Pruppacher and Klett, 2010). INPs with different characteristics have different freezing thresholds. Easily activated INPs can initiate the formation of ice crystals already at low supersaturations (DeMott et al., 2003; Kärcher and Lohmann, 2003). Here, we calculate three temperature-dependent thresholds: one for HOM nucleation and two for HET nucleation. (Urbanek et al., 2017, their Table 1, and original formulations from

Krämer et al., 2016). For the higher HET threshold, we consider coated soot (CS) as the INP, which is ineffective and thus makes higher RHi values necessary. For the lower HET threshold, we choose mineral dust (MD), which is more efficient as an INP needing lower RHi (DeMott et al., 2003; Kärcher and Lohmann, 2002). We also calculate the temperature dependent saturation threshold for liquid water, which serves as a limit for the abovementioned ice nucleation processes, since they cannot take place above it.

Further, we define four RHi regimes independent of the previous analysis. The first one containing RHi values over 147 %, in which HOM nucleation would be possible under favorable conditions (*high RHi regime*). Two regimes containing RHi values where HET nucleation would be possible: *mid RHi regime* containing RHi values from 123% to 147 % and *low RHi regime* with values from 100 % to 123 %. And finally, the *subsaturated regime* containing RHi values below ice saturation. The threshold between the mid and low RHi regime is effectively splitting the range where HET nucleation would be possible in half and is not dependent on a specific INP.

### 3.2.2 Distribution of RHi

In Fig. 4 we present the 2-D probability densities of RHi with respect to ambient temperature for the in-cloud, near-cloud and cloud-free regions of the research flights in the AC and WAI groups (See Sect. 2.3.3 and Sect 2.3.1). Additionally, for each panel we plot the ice saturation threshold (RHi = 100%) and water saturation threshold, and three temperature dependent nucleation thresholds. Two for HET nucleation, one for mineral dust (MD) as INP and one for coated soot (CS) as well as the threshold for HOM nucleation (See Sect. 2.3.4). A small fraction of the data in the in-cloud and near-cloud areas is detected over the water saturation line as was the case also in Ovarlez et al., (2002) who performed in-situ measurements. Similar to them and also Urbanek et al., (2017) who also do not take the water saturation threshold into account in their analysis, we conclude that these are artefacts or erroneous data, but represent a too small amount of the whole data set to have an effect on the further analysis.

Regime names have been changed on every instance.

- **In Figure 5 and related text, as well as in Sects. 4 and 5, the interpretation in terms of “HOM regime” is complicated by the fact that temperatures might be larger than 235 K. It is likely that  $T < 235$  K near cloud top, but it is no sure near cloud base. Additional information related to temperature seems necessary.**

Same also to the previous comment we have changed the naming of our RHi regimes so that it is clear that it only refers to RHi values and not specific nucleation processes as such an assumption could be erroneous. Figure 5 has been changed accordingly, and is shown in the following, as has been the text referring to it. On the topic of the temperature a figure has been added to the supplementary material of this publication as also discussed in comment Nr. 4.

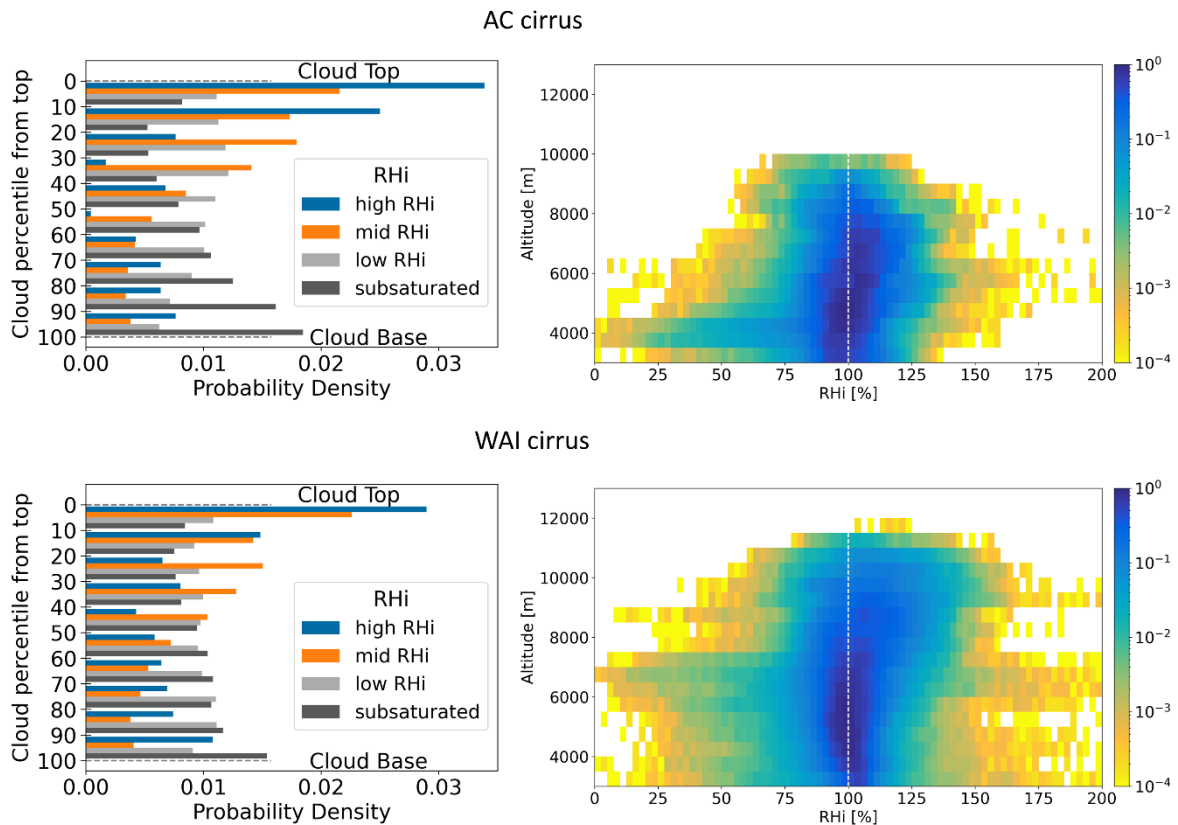

Figure 5: Left: Probability densities of in-cloud RH<sub>i</sub> in a relative location to the cloud top. Every cloud is split into ten percentiles from cloud top to cloud base and for each percentile the probability densities of each RH<sub>i</sub> bin (subsaturated, low RH<sub>i</sub>, mid RH<sub>i</sub> and high RH<sub>i</sub> (See Sect. 2.3.4)) are calculated. Right: Probability densities of in-cloud RH<sub>i</sub> with respect to altitude. Bin sizes are 2.5% RH<sub>i</sub> and 500 m altitude. Top row: Cirrus clouds measured under AC conditions. Bottom row: Cirrus clouds measured under WAI conditions.

- **Can the authors clarify the statement in lines 397-398?**

With this statement we attempt to provide a possible explanation regarding the high RH<sub>i</sub> values detected near cloud base mostly for the WAI cirrus cloud which would be an increase in the available water vapor. From the previous analysis it is known that during WAI events a significant amount of water vapor is transported into the arctic as well as warm airmasses which tend to rise in some cases with high updrafts. This combined with sedimentation of ice crystals into this region would support the mixing of the airmasses, providing the extra water vapor from lower altitudes or result in sublimation of the ice crystals as another way of increasing the water vapor and thus the RH<sub>i</sub>.

## 6. Sections 4 and 5 could be shortened, I felt that there were repetitions.

Sections 4 and 5 have been shortened by removing repetitions.

## Other comments

1. **Line 11: backscatter coefficient: at which wavelength? 532 nm?** The backscatter coefficient is determined from the signal at 532 nm. A clarification has been added at line 110 (possible typo).
2. **Line 159: please define the backscatter ratio** Definition has been added to the text.
3. **Line 163: PLDR > 20 % => could mixed-phase clouds be included at the warmest temperatures?** There is always this possibility especially for the WAI cases, that is why the altitude has also been included as a parameter of the cloud mask. After analyzing the lidar and radar measurements we are confident that no mixed phase clouds have been included in the cloud mask.
4. **Lines 220-222: can you include a reference for this study? And/or for HAMP?** This short study has been performed as an auxiliary to this publication and is not published in its self. A reference for the HAMP radar has been added.
5. **Lines 232, line 263, and caption of Fig. 5: should Sect. 2.3.4 be 2.3.5?** Yes, has been corrected.
6. **Lines 264: should Sect. 2.3.3 be 2.3.4?** Yes, has been corrected.
7. **Lines 371-375: is there evidence that high latitude cirrus clouds in De La Torre Castro et al. (2023) are WAI? Note that in this study, T is smaller than 235 K.** De La Torre Castro et al. (2023) do not include any information regarding the presence of a WAI, but comparing their findings to ours we find similarities between their arctic cirrus and our WAI cirrus measured in the arctic.
8. **Line 375: do you confirm that the “Rolf et al. (2022)” reference is a short abstract?** Yes, that is confirmed.

#### Technical comments

1. **Fig.1: typo: collumn => column** Corrected.
2. **Fig. 5: top left panel: we cannot see the value for high HET (orange) in the 20-30 % range. Move the caption?**

Caption has been moved to better spot.

3. **Lines 359-360: the sentence ends with “,0.23%”. Can you rephrase?**

This was a typo and has been removed.

4. **Kärcher, B.: Supersaturation, dehydration, and denitrification in Arctic cirrus, Atmos. Chem. Phys., 2005 => the reference is incomplete**

Reference has been corrected.
